# Supplementary material for: One-pot synthesis of PtRu nanodendrites as efficient catalysts for methanol oxidation reaction
Source: Royal Society of Chemistry journal article supplement (doi:10.1039/c6nr08895c), 2016-12-15
Supplement: c6nr08895c1.pdf [file c6nr08895c1.pdf]

## Supporting information

### One-Pot Synthesis of PtRu Nanodendrites as Efficient Catalyst for Methanol Oxidation Reaction

Shuanglong Lu,<sup>\*a</sup> Kamel Eid,<sup>\*b</sup> Danhua Ge,<sup>a</sup> Jun Guo,<sup>c</sup> Liang Wang,<sup>b</sup> Hongjing Wang,<sup>\*b</sup> Hongwei Gu<sup>\*a</sup>

- <sup>a</sup> Key Laboratory of Organic Synthesis of Jiangsu Province, College of Chemistry, Chemical Engineering and Materials Science & Collaborative Innovation Centre of Suzhou Nano Science and Technology, Soochow University, Suzhou 215123, P.R. China. E-mail: hongwei@suda.edu.cn
- <sup>b</sup> College of Chemical Engineering, Zhejiang University of Technology, Hangzhou, Zhejiang 310014, P.R. China. E-mail: hjw@zjut.edu.cn
- <sup>c</sup> Analysis and Testing Centre, Soochow University, Suzhou 215123, P.R. China

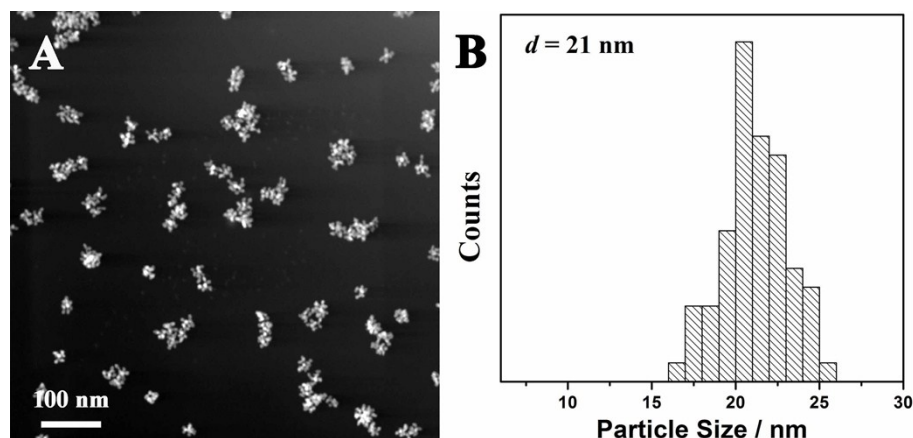

**Figure S1.** (A) HAADF-STEM image and (B) particle size distribution of PtRu nanodendrites synthesized under the typical reaction conditions.

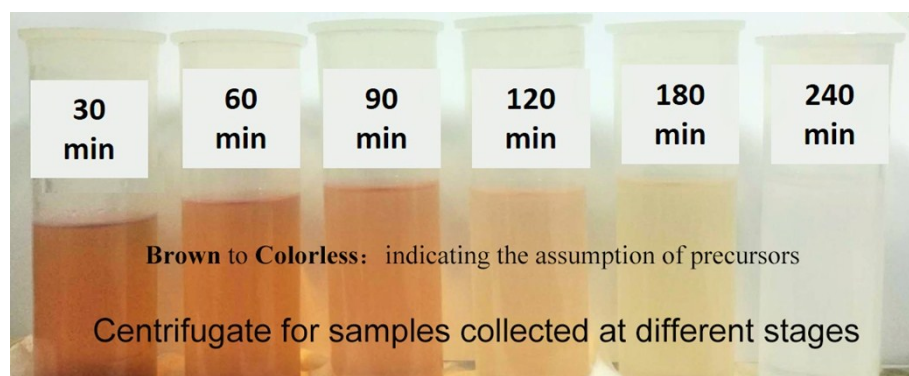

**Figure S2.** Photographs of centrifuges for samples collected at different reaction times.

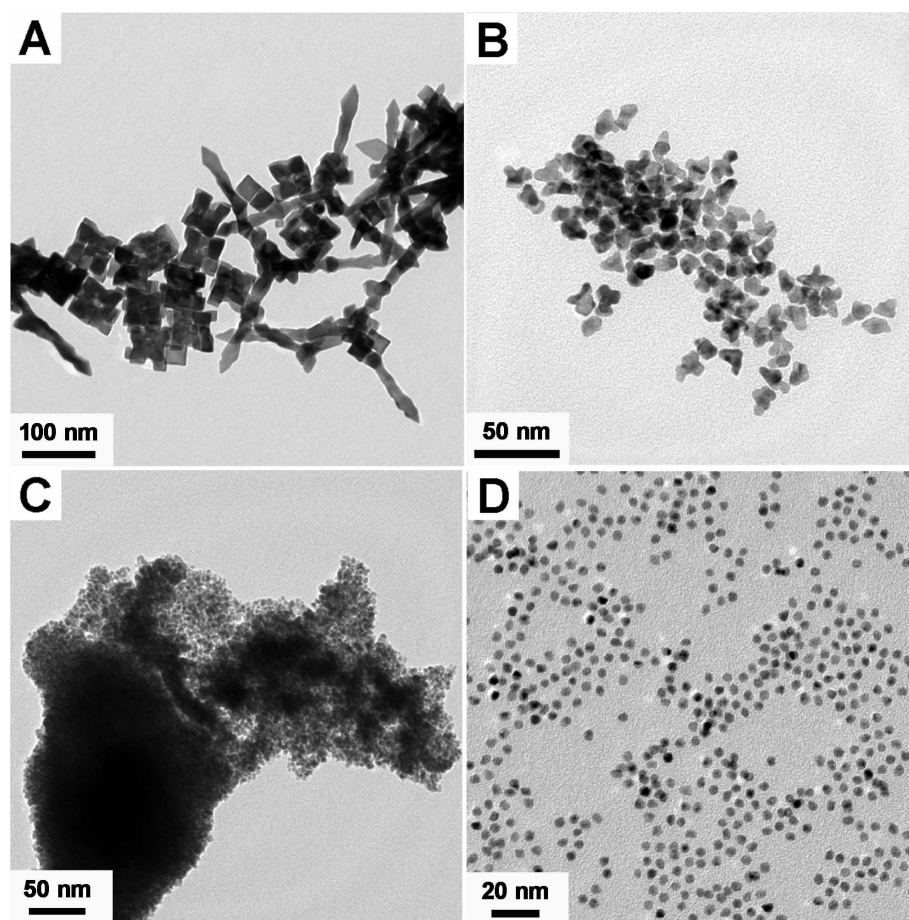

**Figure S3.** (A) TEM images of mono Pt NCs synthesized in the absence of Ru salt; (B) PtRu NCs samples in the presence of 0.0625 mmol of Ru salt; (C) PtRu NCs obtained via using oleic acid instead of oleylamine; (D) PtRu NCs prepared by using N<sub>2</sub> instead of H<sub>2</sub> gas.

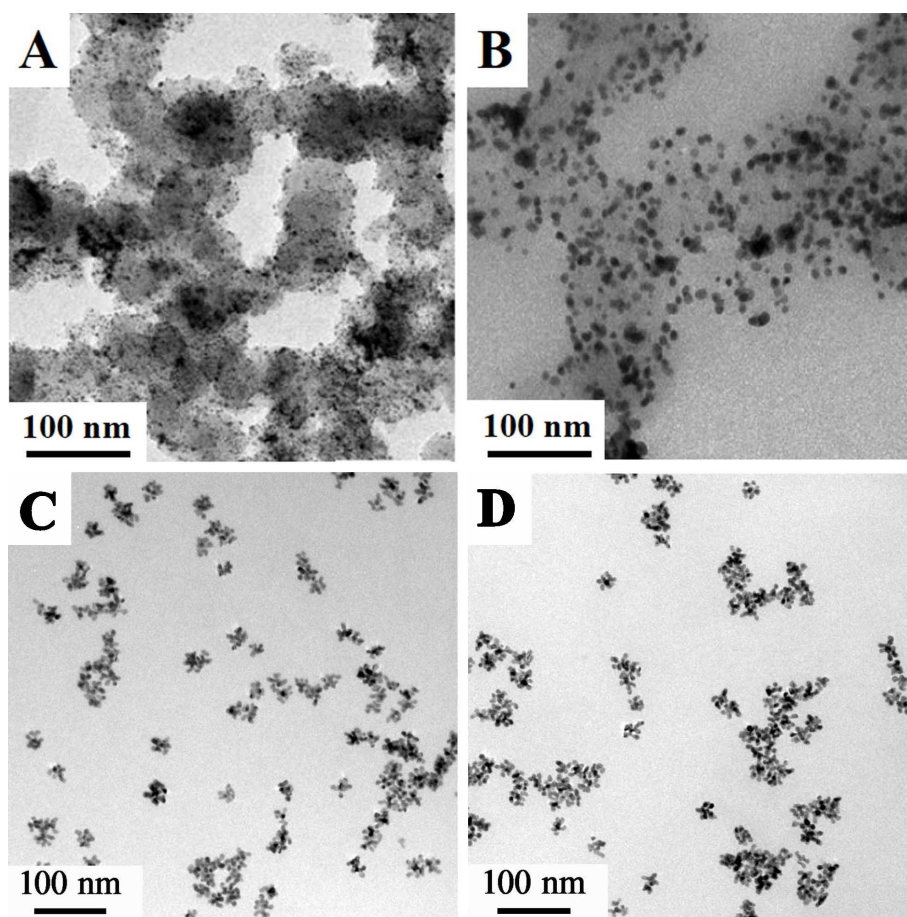

**Figure S4.** TEM images of (a, b) commercial Pt/C catalyst and (c, d) PtRu nanodendrites before and after 2,000 potential durability cycles, respectively.
